# Supplementary material for: Chitin Synthases Are Critical for Reproduction, Molting, and Digestion in the Salmon Louse (Lepeophtheirus salmonis)
Source: MDPI journal article supplement (doi:10.3390/life11010047), 2021-01-13
Supplement: s1 [file s1]

| Tissue     | Treatment |     |      |      | Signals |
|------------|-----------|-----|------|------|---------|
|            | Chitinase | WGA | 1°Ab | 2°Ab |         |
| Cuticle    | +         | +   | +    | +    | Red     |
|            | -         | +   | +    | +    | +       |
|            | -         | -   | +    | +    | -       |
|            | -         | +   | -    | +    | -       |
|            | -         | +   | +    | -    | -       |
| Oocytes    | +         | +   | +    | +    | Red     |
|            | -         | +   | +    | +    | +       |
|            | -         | -   | +    | +    | -       |
|            | -         | +   | -    | +    | -       |
|            | -         | +   | +    | -    | -       |
| Intestine  | +         | +   | +    | +    | Red     |
|            | -         | +   | +    | +    | +       |
|            | -         | -   | +    | +    | +       |
|            | -         | +   | -    | +    | .       |
|            | -         | +   | +    | -    | +       |
| Ovaries    | +         | +   | +    | +    | Red     |
|            | -         | +   | +    | +    | +       |
|            | -         | -   | +    | +    | -       |
|            | -         | +   | -    | +    | -       |
|            | -         | +   | +    | -    | -       |
| Egg string | +         | +   | +    | +    | Red     |
|            | -         | +   | +    | +    | +       |
|            | -         | -   | +    | +    | -       |
|            | -         | +   | -    | +    | -       |
|            | -         | +   | +    | -    | -       |

| Tissue     |           | Treatment |      |      |
|------------|-----------|-----------|------|------|
|            | Chitinase | WGA       | 1°Ab | 2°Ab |
|            | +         | +         | +    | +    |
|            | -         | +         | +    | +    |
| Cuticle    | -         | -         | +    | +    |
|            | -         | +         | -    | +    |
|            | -         | +         | +    | -    |
|            | +         | +         | +    | +    |
|            | -         | +         | +    | +    |
| Oocytes    | -         | -         | +    | +    |
|            | -         | +         | -    | +    |
|            | -         | +         | +    | -    |
|            | +         | +         | +    | +    |
|            | -         | +         | +    | +    |
| Intestine  | -         | -         | +    | +    |
|            | -         | +         | -    | +    |
|            | -         | +         | +    | -    |
|            | +         | +         | +    | +    |
|            | -         | +         | +    | +    |
| Ovaries    | -         | -         | +    | +    |
|            | -         | +         | -    | +    |
|            | -         | +         | +    | -    |
|            | +         | +         | +    | +    |
|            | -         | +         | +    | +    |
| Egg string | -         | -         | +    | +    |
|            | -         | +         | -    | +    |
|            | -         | +         | +    | -    |

|         |
|---------|
| Signals |
|         |
| Red     |
| +       |
| -       |
| -       |
| -       |
| Red     |
| +       |
| -       |
| -       |
| -       |
| Red     |
| +       |
| +       |
| -       |
| +       |
| Red     |
| +       |
| -       |
| -       |
| -       |
| Red     |
| +       |
| -       |
| -       |
| -       |
