# Supplementary figures and images for: Chitin Synthases Are Critical for Reproduction, Molting, and Digestion in the Salmon Louse (Lepeophtheirus salmonis)
Source: MDPI journal article supplement (doi:10.3390/life11010047), 2021-01-13

**A**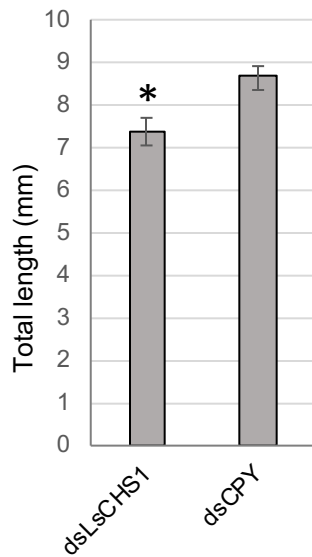**B**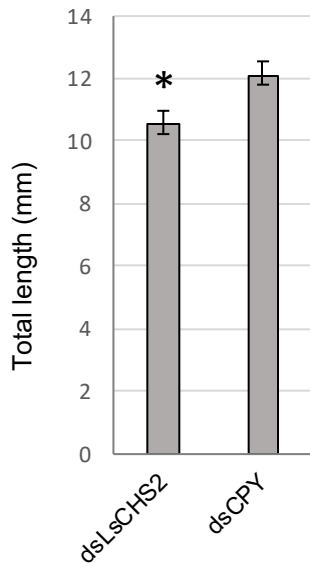**C**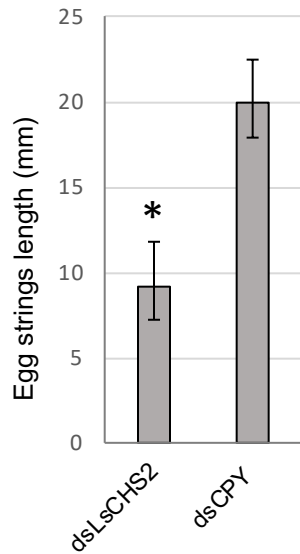

Supplement: s1 [file s1]

A

Control

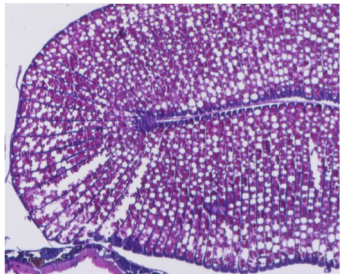

B

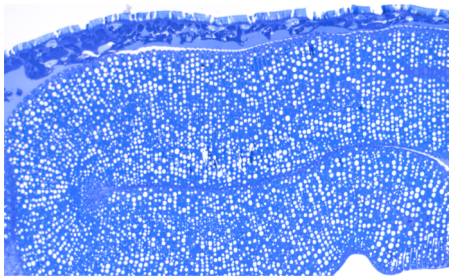

C

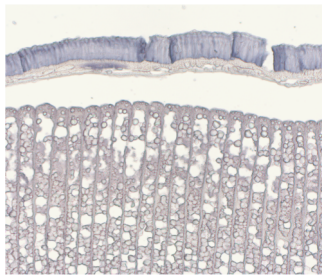

CHS2 knockdown

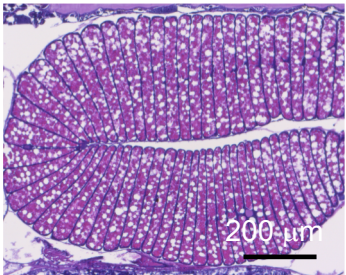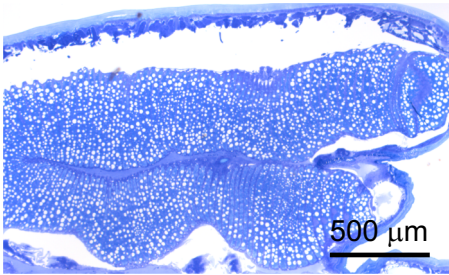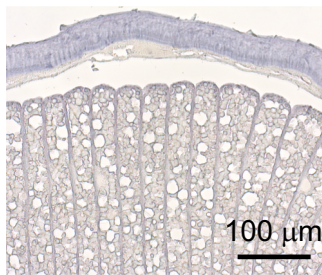

Supplement: s1 [file s1]

**A****Control****CHS1 knockdown****H&E-staining**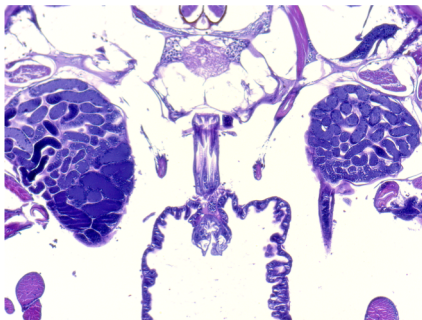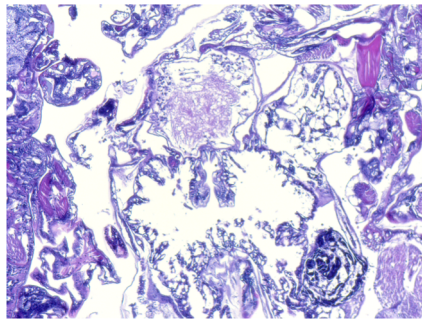**WGA-staining**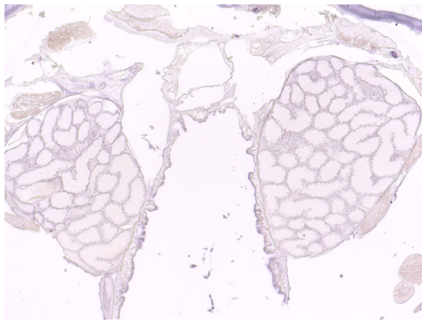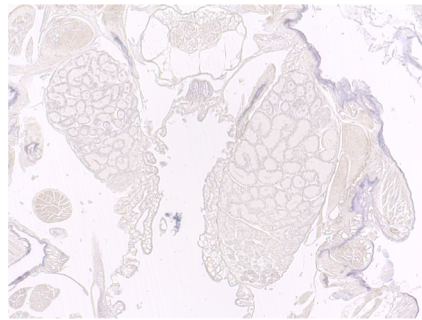

Supplement: s1 [file s1]
